# Supplementary material
Source: PubMed Central journal article supplement (PMC4329117)

## **SUPPLEMENTARY MATERIALS**

The supplementary information contains Supplementary materials and methods, Supplementary reference 1, and the legend for Supplementary Figure 1.

## **MATERIALS AND METHODS**

**Cell culture.** MKN28 gastric epithelial cells were cultured at 37°C under 5% CO<sub>2</sub>/95% O<sub>2</sub> in RPMI medium 1640 (GIBCO/BRL) supplemented with 10% FBS (Sigma) and gentamycin (20 µg/ml, Sigma). For co-culture experiments with *H. pylori*, RPMI medium 1640 supplemented with 10% FBS without gentamycin was used.

**Western blot analysis.** For analysis of total cellular protein, MKN28 cells were cultured for 72 hours and then co-cultured with or without *H. pylori* for 48 hours. Cells were lysed in RIPA buffer (50mM Tris, 150mM NaCl, 1% Triton X-100, 0.1% SDS) for 10 minutes at 4°C, centrifuged at 13,000 rpm for 10 minutes and supernatants were collected. To determine the effects of *H. pylori* on claudin-7 localization, detergent soluble and insoluble MKN28 cell fractions were separated by differential detergent extraction as previously described<sup>1</sup>. Cells were lysed in lysis buffer (0.5% Triton X-100, 150mM NaCl, 50mM Tris-HCl) for 30 minutes at 4°C with rotation. Cells were centrifuged (14,000 rpm, 10 minutes) and supernatants were collected as the detergent soluble fraction. Pellets were then resuspended in lysis buffer containing 0.02% SDS, incubated for 30 minutes at 4°C, centrifuged (14,000 rpm, 10 minutes) and the supernatant was collected as the detergent insoluble fraction. Protein concentrations were quantified by the BCA assay

(Pierce). Proteins (20  $\mu$ g) were separated by SDS-PAGE and transferred to polyvinylidene difluoride (PVDF) membranes. Claudin-7 was detected using an anti-claudin-7 antibody (1:200, Life Technologies) in combination with goat anti-rabbit IgG (1:5000, Sigma) HRP-conjugated secondary antibody. Snail was detected using an anti-snail antibody (1:100, ABGENT) in combination with goat anti-rabbit IgG (1:5000, Sigma) HRP-conjugated secondary antibody. Samples were re-probed using a mouse anti-GAPDH antibody (Santa Cruz Biotechnology) as an additional control for equal loading. Primary antibodies were visualized by Western Lightning Chemiluminescence Reagent Plus according to the manufacturer's instructions.

**Transfections and Luciferase Assays.** MKN28 cells in 12-well plates were transfected with 3  $\mu$ l of Lipofectamine 2000 (Life Technologies) according to the manufacturer's instructions, and 1  $\mu$ g/ml Topflash or Fopflash (kind gifts from K. Kinzler and B. Vogelstein, Johns Hopkins University) with 1  $\mu$ g/ml Renilla vector in Opti-MEM (Life Technologies) for 24 hours. Transfection mixtures were then replaced with complete medium containing *H. pylori* or medium alone. After 24 hours, cells were harvested in 1x Passive Lysis Buffer (Promega). Luciferase activity was determined using a luminometer and normalized to Renilla luciferase using the Dual-Luciferase assay kit (Promega).

**Transient transfection of siRNA.** MKN28 cells in 12-well plates were transiently transfected using Lipofectamine 2000 transfection reagent (Life Technologies) according to the manufacturer's instructions. Briefly, transfection reagent (2.0  $\mu$ l/well) was mixed

with siRNA oligonucleotides (5  $\mu$ l of 20  $\mu$ M solution/well) in 200  $\mu$ l Opti-MEM (Life Technologies). Cells were incubated with the transfection mixture for 24 hours, fresh medium was added, and bacterial co-cultures were performed 24 hours later.

**Immunofluorescence.** Gastric epithelial cells were cultured on four-well chamber-slides (Nalge Nunc), and gastroids were cultured on MatTek dishes (MATTEK Corporation), washed twice in 1X PBS, and formalin-fixed. Cells were permeabilized using 1X PBS containing 0.1% Triton X-100 (30 minutes, room temperature), washed three times in 1X PBS, and non-specific binding was blocked by incubation in 1% BSA. Phalloidin was used to stain F-actin (Molecular Probes). Specific cell types in formalin-fixed gastroids were identified with antibodies raised against mucin (Sigma), or H<sup>+</sup>K<sup>+</sup>ATPase, gastrin, or chromogranin A (kind gifts from J. Goldenring, Vanderbilt University). Gastroids were stained with mouse anti-occludin (Life Technologies) followed by Alexa fluor 594-conjugated anti-mouse IgG antibody, rabbit anti-cleaved caspase 3 (Cell Signaling) followed by Alexa Fluor 488-conjugated anti-rabbit IgG antibody (1:200, Molecular Probes), or rabbit anti-snail (Abcam) followed by Alexa Fluor 488-conjugated anti-rabbit IgG antibody (1:200, Molecular Probes) and Hoechst 33342. MKN28 cells were stained with rabbit anti-claudin-7 antibody (1:200, Life Technologies) and Alexa Fluor 488-conjugated anti-rabbit IgG antibody (1:200, Molecular Probes). Images were captured using an Olympus FV-1000 Inverted Confocal Microscope. Image acquisition was performed using Fluoview FV10-ASW 1.7 software.

## REFERENCES

1. Wroblewski LE, Shen L, Ogden S, et al. *Helicobacter pylori* dysregulation of gastric epithelial tight junctions by urease-mediated myosin II activation. *Gastroenterology* 2009;136;1:236-46.

### Legend for Supplementary Figure 1.

$\beta$ -catenin, but not apoptosis, is increased in treated gastroids. (A) Quantification of  $\beta$ -catenin demonstrating that the number of cells with cytoplasmic  $\beta$ -catenin is significantly increased in gastroids following treatment with LiCl. (B) Gastroids were uninfected, treated with LiCl, or infected with *H. pylori* strain 7.13 and stained for cleaved caspase 3 (green), a marker of apoptosis; nuclei are labeled with Hoechst (blue). (C) Cleaved caspase 3 quantification demonstrating no significant differences in apoptosis in uninfected, LiCl-treated, or *H. pylori* strain 7.13-infected gastroids. Data are expressed as means  $\pm$  s.e.m, n=3 independent replicates.

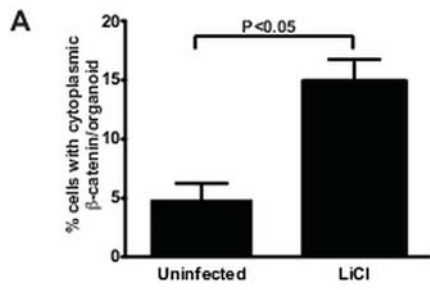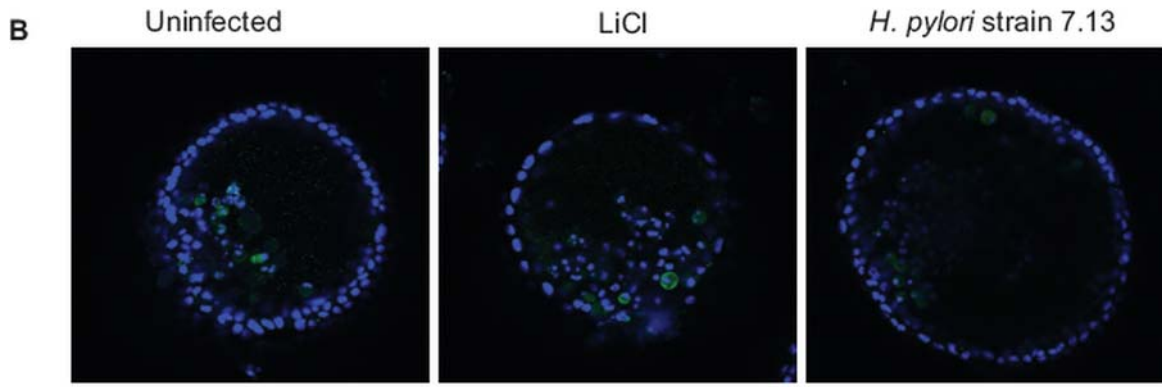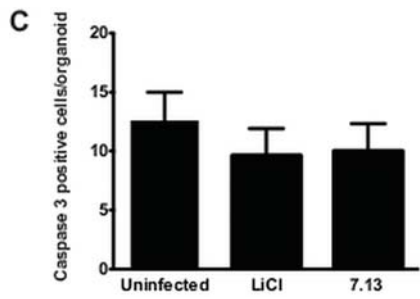

Supplement: NIHMS633673-supplement-supplementary_data.pdf [file NIHMS633673-supplement-supplementary_data.pdf]
